# Supplementary material for: Relationships between Obesity, Nutrient Supply and Primary Open Angle Glaucoma in Koreans
Source: PubMed Central journal article supplement (PMC7146578; doi:10.3390/nu12030878), 2020-03-24
Supplement: nutrients-12-00878-s001.pdf [file nutrients-12-00878-s001.pdf]

## Supplementary Materials

**Table S1.** Difference of diet intake between glaucoma and non-glaucoma group in non-obese female group. (Bmi<25)

| Diet                           | Glaucoma (n=99) | Non-glaucoma (n=2,699) | p value  |                      |                      |
|--------------------------------|-----------------|------------------------|----------|----------------------|----------------------|
|                                |                 |                        | Model 1* | Model 2 <sup>†</sup> | Model 3 <sup>‡</sup> |
| Intake of food (g)             | 1171.59(77.78)  | 1337.35(17.88)         | 0.139    | 0.025                | 0.022                |
| Energy (kcal)                  | 1576.95(70.40)  | 1743.32 (18.48)        | 0.118    | 0.037                | 0.032                |
| Protein intake (g)             | 53.09(3.23)     | 63.76(0.99)            | 0.033    | 0.011                | 0.008                |
| Fat intake (g)                 | 28.02(2.53)     | 37.10(0.69)            | 0.129    | 0.008                | 0.006                |
| Carbohydrate intake (g)        | 276.22(12.27)   | 288.36(2.94)           | 0.159    | 0.109                | 0.098                |
| Crude fiber intake (g)         | 6.33(0.53)      | 6.82(0.13)             | 0.144    | 0.139                | 0.106                |
| Ash intake (g)                 | 16.73(1.06)     | 18.12(0.26)            | 0.314    | 0.262                | 0.229                |
| Calcium intake (mg)            | 426.02(41.29)   | 476.68(7.76)           | 0.261    | 0.069                | 0.061                |
| Phosphorus intake (mg)         | 934.07(56.15)   | 1054.81(12.56)         | 0.068    | 0.013                | 0.010                |
| Iron intake (mg)               | 12.52(0.99)     | 13.65(0.43)            | 0.146    | 0.193                | 0.157                |
| Sodium intake (mg)             | 4250.59(308.60) | 4357.62(74.70)         | 0.963    | 0.900                | 0.862                |
| Potassium intake (mg)          | 2400.54(147.56) | 2813.89(39.06)         | 0.005    | 0.002                | 0.002                |
| Vitamin A intake ( $\mu$ g RE) | 711.54(88.62)   | 756.67(19.12)          | 0.628    | 0.690                | 0.637                |
| B-carotene intake ( $\mu$ g)   | 3506.67(492.33) | 3826.80(102.36)        | 0.399    | 0.520                | 0.480                |
| Retinol intake ( $\mu$ g)      | 105.25(26.09)   | 106.15(5.60)           | 0.556    | 0.934                | 0.967                |
| Thiamin intake (mg)            | 1.01(0.06)      | 1.19(0.02)             | 0.053    | 0.006                | 0.004                |
| Riboflavin intake (mg)         | 0.99(0.08)      | 1.13(0.02)             | 0.417    | 0.197                | 0.172                |
| Niacin intake (mg)             | 12.45(0.73)     | 14.97(0.22)            | 0.012    | 0.004                | 0.003                |
| Vitamin C intake (mg)          | 88.72(10.08)    | 110.02(2.68)           | 0.046    | 0.001                | <0.001               |

Data are presented as mean (standard error).

\*Model 1: adjusted for age

<sup>†</sup>Model 2: adjusted for age, diabetes, hypertension, high-density lipoprotein cholesterol, intraocular pressure.

<sup>‡</sup>Model 3: adjusted for age, diabetes, hypertension, high-density lipoprotein cholesterol, body mass index, intraocular pressure, smoking, drinking alcohol.

**Table S2.** Difference of diet intake between glaucoma and non-glaucoma group in non-obese males.  
(Bmi<25)

| Diet                           | Glaucoma<br>(n=106) | Non-glaucoma (n=1,479) | p value  |          |          |
|--------------------------------|---------------------|------------------------|----------|----------|----------|
|                                |                     |                        | Model 1* | Model 2† | Model 3‡ |
| Intake of food (g)             | 1702.36 (102.34)    | 1837.64(32.26)         | 0.480    | 0.559    | 0.568    |
| Energy (kcal)                  | 2326.67(99.25)      | 2517.37(31.46)         | 0.271    | 0.249    | 0.248    |
| Protein intake (g)             | 80.36(3.72)         | 93.77(1.67)            | 0.043    | 0.019    | 0.021    |
| Fat intake (g)                 | 45.82(3.91)         | 55.39(1.21)            | 0.426    | 0.226    | 0.236    |
| Carbohydrate intake (g)        | 363.57(13.89)       | 372.87(4.30)           | 0.590    | 0.653    | 0.693    |
| Crude fiber intake (g)         | 8.43(0.48)          | 8.02(0.15)             | 0.687    | 0.735    | 0.671    |
| Ash intake (g)                 | 24.36(1.25)         | 24.51(0.39)            | 0.880    | 0.842    | 0.844    |
| Calcium intake (mg)            | 636.10(45.40)       | 588.48(10.79)          | 0.248    | 0.145    | 0.146    |
| Phosphorus intake (mg)         | 1375.86(51.92)      | 1455.41(19.10)         | 0.450    | 0.407    | 0.436    |
| Iron intake (mg)               | 17.14(1.15)         | 17.59(0.31)            | 0.617    | 0.907    | 0.931    |
| Sodium intake (mg)             | 5969.61(380.99)     | 6171.19(114.39)        | 0.680    | 0.556    | 0.530    |
| Potassium intake (mg)          | 3418.04(152.70)     | 3596.19(51.29)         | 0.442    | 0.441    | 0.483    |
| Vitamin A intake ( $\mu$ g RE) | 874.03(64.46)       | 1014.45(40.74)         | 0.169    | 0.446    | 0.422    |
| B-carotene intake ( $\mu$ g)   | 4401.72(348.79)     | 5214.96(240.35)        | 0.096    | 0.322    | 0.301    |
| Retinol intake ( $\mu$ g)      | 145.67(31.32)       | 132.59(5.83)           | 0.278    | 0.316    | 0.309    |
| Thiamin intake (mg)            | 1.49(0.09)          | 1.70(0.03)             | 0.171    | 0.069    | 0.082    |
| Riboflavin intake (mg)         | 1.45(0.11)          | 1.52(0.03)             | 0.822    | 0.810    | 0.793    |
| Niacin intake (mg)             | 19.55(1.09)         | 21.96(0.39)            | 0.178    | 0.163    | 0.184    |
| Vitamin C intake (mg)          | 110.72(7.77)        | 116.74(2.84)           | 0.617    | 0.924    | 0.955    |

Data are presented as mean (standard error).

\*Model 1: adjusted for age

†Model 2: adjusted for age, diabetes, hypertension, high-density lipoprotein cholesterol, intraocular pressure.

‡Model 3: adjusted for age, diabetes, hypertension, high-density lipoprotein cholesterol, body mass index, intraocular pressure, smoking, drinking alcohol.
